# Supplementary material
Source: publisher figshare collection journal article supplement (https://gsapubs.figshare.com/ndownloader/files/38296662)
Supplement: Supplementary file 1 [file 38296662]

## Sheet: Foglio1
Table S1 - Results of MHSZ top and base in scientific drilling boreholes considered (graphic displays in Fig. S1 and in Plates P1 and P2)
HERODOTUS - LEVANTINE BASIN
			acquisition date	location	position	water depth (m)	average geothermal gradient (°C/km)	TOP MHSZ (mbsl) real salinity data	TOP MHSZ (mbsl) assumed costant salinity data	BASE MHSZ (mbsl) real salinity data	BASE MHSZ (mbsl) assumed costant salinity data
160	965		May 1995	Eratosthenes seamount	33°55.O8O'N, 32°42.785'E	1506.6	7.5	1347.92	1327.59	2290.92	2340.91
160	966		Mar 1995	Eratosthenes seamount	33°47.799'N, 32°42.095'E	926.3	25.06	n.d.	n.d	n.d	n.d
160	967		Apr 1995	Eratosthenes seamount	34°04.098'N, 32°43.523'E	2553	22.13	1340.52	1341.16	2740.11	2791.6
160	968		Apr 1996	Eratosthenes seamount	34°19.900'N, 32°45.065'E	1961	15.74	1328.42	1328.51	2100.4	2215.31
160	969		Apr 1997	Mediterranean Ridge	33°50.462'N, 24°52.981'E	2200.3	8.00-11.20	1356.51	1356.59	2412.81	2662.93
160	970	A	Apr 1998	Olimpi mud dome	33°44.194'N, 24°48.120'E	2075.5	11.76-18.36	1355.42	1355.5	2242.32	2338.55
		B	Apr 1999	Olimpi mud dome	33°44.214'N, 24°48.694'E	2078.6	11.76	1355.42	1355.5	2129.93	2486.21
		C	Apr 2000	Olimpi mud dome	33°44.134'N, 24°47.457'E	2036.9	11.76	n.d	n.d	n.d	n.d
		D	Apr 2001	Olimpi mud dome	33°44.042'N, 24°46.613'E	1953.7	11.76	n.d	n.d	n.d	n.d
160	971	A	Apr 2002	Napoli mud volcano	33°42.190'N, 24°42.814'E	2026.1	23.82 – 45.19	1350.8	1350.75	2056.25	2122.13
		B	Apr 2003	Napoli mud volcano	33°42.817'N, 24°42.108'E	2140.9	23.81-45.19	1350.8	1350.75	2169.71	2254.6
		D	Apr 2004	Napoli mud volcano	33°43.437'N, 24°41.276'E	1933.1	45.19	1350.8	1350.75	1933.27	1999.55
		E	Apr 2005	Napoli mud volcano	33°43.621'N, 24°40.839'E	1943.6	45.19	1350.8	1350.75	1943.89	2008.84
42	375		May 1978	Florence rise	34°45.74'N,31°45.58'E	1900	25.934	1357.98	1359.22	1969.91	1965.96
42	376		May 1978	Florence rise	34°52.32'N, 31°48.45/ E	2101	26.06	1355.02	1354.94	2252.85	2256.6
13	130		Sept 1970	Levantine sea	33° 36.3 l'N, 27° 51.99'E.	2979	20.56	1350.59	1350.95	3300.28	3294.16
AEGEAN SEA
			acquisition date	location	position	water depth (m)	average geothermal gradient (°C/km)	TOP MHSZ (mbsl) real salinity data	TOP MHSZ (mbsl) assumed costant salinity data	BASE MHSZ (mbsl) real salinity data	BASE MHSZ (mbsl)assumed costant salinity data
42	378		May 1978	Cretan basin	35°55.67'N, 25°06.97'E	1835	41.18-83.06	1452.04	1452.08	1862.85	1861.52
IONIAN BASIN
			acquisition date	location	position	water depth (m)	average geothermal gradient (°C/km)	TOP MHSZ (mbsl) real salinity data	TOP MHSZ (mbsl) assumed costant salinity data	BASE MHSZ (mbsl) real salinity data	BASE MHSZ (mbsl)assumed costant salinity data
13	125		Sept 1970	Mediterranean Ridge	34° 37.49'N,20° 25.7Ó'E	2782	48.76	1333.63	1333.4	2889.4	2915.21
13	126		Sept 1970	Cleft in Mediterranean ridge	35° 09.72'N, 21° 25.63'E	3730	102.82	1351.82	1351.49	3807.43	3806.89
13	127		Sept 1970	Hellenic trench	35° 43.90'N, 22° 29.81'E	4654	117.192	1356.8	1356.87	4711.25	4718.98
13	128		Sept 1970	Hellenic trench	36° 43.90'N ,22° 29.81'E	4640	117.01	1356.82	1356.87	4708.15	4715.21
42	374		Apr 1978	Messina abyssal plain	35°50.87'N, 18°11.78'E	4078	24.20-29.58	1351.62	1351.68	4279.9	4414.18
160	964		Mar 1995	Ionian abyssal plain	36°15.623'N, 17°45.00'E	3657.7	17.39-44.83	1347.93	1347.95	3848.44	3866.1
160	972		Apr 1995	Mediterranean Ridge	35°46.797'N, 18°43.515'E	3930.6	15.26-28.46	1330.72	1330.56	4008.76	4320.61
160	973		Apr 1996	Mediterranean Ridge	35°46.820'N, 18°56.889'E	3695	19.29-31.45	1328.5	1328.43	3767.09	3957.85
TYRRHENIAN BASIN
			acquisition date	location	position	water depth (m)	average geothermal gradient (°C/km)	TOP MHSZ (mbsl) real salinity data	TOP MHSZ (mbsl) assumed costant salinity data	BASE MHSZ (mbsl) real salinity data	BASE MHSZ (mbsl)assumed costant salinity data
107	650		Jan 1986	Marsili basin	39° 21.40'N.; 13° 54.05'E	3529	143.078	1247.83	1247.45	3580.28	3579.54
107	651		Jan 1987	Vavilov basin	40°09.03'N, 12°45.39'E	3590.9	104.4	1257.43	1256.98	3656.92	3657.41
107	652		Jan 1988	Lower Sardinia Margin	40°21.30'N 12°08.59'E	3470.5	133.726	1250.12	1249.94	3509.42	3509.38
107	653		Jan 1989	Cornglia Terrace	40°15.86'N; 11°26.99'E	2831.4	93.42	1311.21	1310.64	2890.17	2890.94
107	654		Feb 1986	Upper Sardinia marign	40°34.76'N; 10°41.80'E	2218.4	44.176	1240.92	1240.9	2319.41	2318.39
107	655		Feb 1987	Gortani Ridge, Western Vavilov Basin	40° 10.33'N 12°27.92'E	3330.8	67.29	1257.61	1257.17	3440.49	3474.74
161	974		May 1995	Tyrrhenian Sea	40°21.364'N, 12°8.506'E	3453.9	132.67	1260.47	1260.39	3514.05	3514.05
13	132		Sept 1970	Tyrrhenian rise	40° 15.7θ'N,11° 26.47'E	2835	126.4	1311.21	1310.65	2883.76	2884.15
PROCENÇAL-BALEARIC BASIN
			acquisition date	location	position	water depth (m)	average geothermal gradient (°C/km)	TOP MHSZ (mbsl) real salinity data	TOP MHSZ (mbsl) assumed costant salinity data	BASE MHSZ (mbsl) real salinity data	BASE MHSZ (mbsl)assumed costant salinity data
42	371		Apr 1978	South Balearic Basin	37°35.8'N, 05°14.55'E	2792	83.42	1206.11	1199.89	2824.9	2837.07
42	372		Apr 1979	Menorca Rise	40°01.86'N, 04°47.79'E	2699	56.00-79.52	1237.81	1230.93	2760.37	2771.34
13	123		Ago 1970	Valencia Basement Ridge	40° 37.83'N,02° 50.27'E.	2290	46.07	1223.56	1223.83	2389.42	2394.41
13	124		Ago 1970	Belearic Rise	38° 52.38'N, 04° 59.69'E.	2726	74.57	1222.17	1222.09	2756.35	2756.63
161	975		May 1995	South Balearic Margin	38°53.795'N, 4°30.587'E	2415.1	65.71	1234.28	1234.44	2498.65	2497.81
ALBORAN BASIN
			acquisition date	location	position	water depth (m)	average geothermal gradient (°C/km)	TOP MHSZ (mbsl) real salinity data	TOP MHSZ (mbsl) assumed costant salinity data	BASE MHSZ (mbsl) real salinity data	BASE MHSZ (mbsl)assumed costant salinity data
161	976		May 1995	Alboran Sea	36°12.318'N,4°18.800'W	1107.93	76.02	n.d	n.d	n.d	n.d
161	977		June 1995	Eastern Alboran Sea	36°01.907'N, 1°57.319'W	1984	83.38	1224.97	1224.56	2040.34	2038.05
161	978		June 1995	Eastern Alboran Sea	36°13.867'N, 2°3.424'W	1929.4	87.79	1235.46	1234.95	1943.16	1943.14
161	979		June 1995	Alboran Sea	35°43.427'N, 3°12.353'W	1062.1	99.92	n.d	n.d	n.d	n.d
13	121		Ago 1970	Wwestern Alboran Basin	36°09.65fN, 04° 22.43'W	1163	72.38	n.d	n.d	n.d	n.d
PELAGIAN BASIN
			acquisition date	location	position	water depth (m)	average geothermal gradient (°C/km)	TOP MHSZ (mbsl) real salinity data	TOP MHSZ (mbsl) assumed costant salinity data	BASE MHSZ (mbsl) real salinity data	BASE MHSZ (mbsl)assumed costant salinity data
160	963		Mar 1995	Gela Basin	37°01.938'N, 13°10.896'E	469.8	50 - 70.84	n.d	n.d	n.d	n.d

## Sheet: G50426
Camerlenghi, A., et al., 2023, Subsurface heat and salts cause exceptionally limited methane hydrate stability in the Mediterranean Basin: Geology, https://doi.org/10.1130/G50426.1
